# Supplementary material for: The Dynamic Exome: acquired variants as individuals age
Source: publisher site journal article supplement (doi:10.18632/aging.100674), 2014-06-16
Supplement: Supplementary file [file aging-v6i6-100674-supplementary-material-SD1.pdf]

## SUPPORTING INFORMATION

Please browse the full text version of this manuscript to see the Supporting Tables S2 and S4.

**Table S1.** Statistics on all genetic variants called with respect to the human genome reference (hg19) and their characteristics and biological predictions.

|                                                | Individual - 1 |        | Individual - 2 |        | Individual - 3 |        |        |
|------------------------------------------------|----------------|--------|----------------|--------|----------------|--------|--------|
|                                                | Age 17         | Age 30 | Age 29         | Age 45 | Age 42         | Age 51 | Age 57 |
| Read coverage on target                        | 139x           | 168x   | 137x           | 143x   | 164x           | 159x   | 153x   |
| Total SNV and indels vs hg19                   | 61,892         | 62,617 | 61,411         | 61,567 | 61,892         | 61,591 | 61,637 |
| Variable microsatellites vs hg18               | 1,425          | 1,612  | 1,300          | 1,282  | 1,374          | 1,351  | 1,335  |
| <b>Exonic function (Reference Gene)</b>        |                |        |                |        |                |        |        |
| nonsynonymous SNVs                             | 11,353         | 11,498 | 11,100         | 11,331 | 11,427         | 11,383 | 11,382 |
| synonymous SNVs                                | 11,658         | 11,797 | 11,709         | 11,736 | 11,718         | 11,685 | 11,670 |
| frameshift indels                              | 139            | 139    | 121            | 154    | 116            | 120    | 116    |
| nonframeshift indels                           | 202            | 207    | 221            | 217    | 231            | 234    | 234    |
| stopgain                                       | 100            | 110    | 93             | 86     | 80             | 73     | 78     |
| stoploss                                       | 12             | 13     | 14             | 10     | 15             | 13     | 15     |
| <b>Reference Gene function</b>                 |                |        |                |        |                |        |        |
| Upstream                                       | 29             | 28     | 36             | 34     | 27             | 30     | 31     |
| Downstream                                     | 42             | 45     | 36             | 39     | 33             | 37     | 37     |
| Exonic                                         | 24,001         | 24,287 | 23,779         | 24,055 | 24,096         | 24,022 | 23,997 |
| Intergenic                                     | 250            | 251    | 263            | 269    | 296            | 300    | 294    |
| Intronic                                       | 228            | 233    | 238            | 236    | 258            | 241    | 255    |
| Splicing                                       | 40             | 43     | 49             | 49     | 47             | 50     | 47     |
| 3' UTRs                                        | 27,430         | 27,703 | 26,631         | 26,234 | 26,487         | 26,325 | 26,358 |
| 5' UTRs                                        | 3,722          | 3,828  | 4,415          | 4,417  | 4,502          | 4,506  | 4,499  |
| <b>Databases match</b>                         |                |        |                |        |                |        |        |
| COSMIC somatic cancer mutation database        | 2,057          | 2,068  | 2,071          | 2,035  | 2,129          | 2,124  | 2,120  |
| nsSNVs not reported in dbSNP137                | 934            | 1,053  | 690            | 671    | 820            | 750    | 740    |
| <b>Functional effects prediction</b>           |                |        |                |        |                |        |        |
| Polyphen: Probably damaging (D)                | 1,150          | 1,224  | 1,156          | 1,182  | 1,227          | 1,190  | 1,181  |
| Mutation tester: Disease causing automatic (A) | 29             | 35     | 25             | 23     | 30             | 23     | 27     |

**Table S3.** Disease ontology analysis of genes with functionally damaging variants indicates increased risk of developing age-related diseases.

|                      | Individual - 1   | Individual - 2   | Individual - 3  |                  |
|----------------------|------------------|------------------|-----------------|------------------|
|                      | (13 years apart) | (16 years apart) | (9 years apart) | (15 years apart) |
| Nonframeshift indels | 19               | 165              | 32              | 27               |
| Frameshift indels    | 21               | 128              | 13              | 18               |
| Ratio                | 1.11             | 0.78             | 0.41            | 0.67             |
